## **Observation**

**Title:** Phospholipid Metabolism Is Associated with HIV Rebound Upon Treatment Interruption

**Running title:** Phospholipids and HIV Persistence

**Authors:** Leila B. Giron<sup>1</sup>, Emmanouil Papasavvas<sup>1</sup>, Xiangfan Yin<sup>1</sup>, Aaron R. Goldman<sup>1</sup>, Hsin-Yao Tang<sup>1</sup>, Clovis S. Palmer<sup>2,3</sup>, Alan L. Landay<sup>4</sup>, Jonathan Z. Li<sup>5</sup>, John R. Koethe<sup>6</sup>, Karam Mounzer<sup>7</sup>, Jay R. Kostman<sup>7</sup>, Qin Liu<sup>1</sup>, Luis J. Montaner<sup>1</sup>, Mohamed Abdel-Mohsen<sup>1‡</sup>

**Affiliations:** <sup>1</sup>The Wistar Institute, Philadelphia, PA, 19104, USA; <sup>2</sup>The Burnet Institute, Melbourne, Victoria, 3004, Australia; <sup>3</sup>Department of Infectious Diseases, Monash University, Melbourne, Victoria, 3004, Australia; <sup>4</sup>Rush University, Chicago, IL, 60612, USA; <sup>5</sup>Department of Medicine, Brigham and Women's Hospital, Harvard Medical School, Boston, MA 02115, USA; <sup>6</sup>Vanderbilt University, Nashville, TN, 37235, USA; <sup>7</sup>Philadelphia FIGHT, Philadelphia, PA, 19107, USA.

<sup>‡</sup> **Corresponding Author:** Mohamed Abdel-Mohsen, Ph.D. Assistant Professor, The Wistar Institute, 3601 Spruce Street, Philadelphia, PA 19104. Phone: 215-898-6008. Email: [mmohsen@Wistar.org](mailto:mmohsen@Wistar.org)

**ABSTRACT:** Lipids are biologically active molecules involved in a variety of cellular processes and immunological functions, including inflammation. It was recently shown that phospholipids and their derivatives, lysophospholipids, can reactivate latent (dormant) tumor cells, causing cancer recurrence. However, the potential link between lipids and HIV latency, persistence, and viral rebound after cessation of antiretroviral therapy (ART) has never been investigated. We explored the links between plasma lipids and the burden of HIV during ART. We profiled the circulating lipidome from the plasma of 24 chronically HIV-infected individuals on suppressive ART who subsequently underwent an analytic treatment interruption (ATI) without concurrent immunotherapies. The pre-ATI viral burden was estimated as time-to-viral-rebound and viral load setpoints post-ATI. We found that higher pre-ATI levels of lysophospholipids, including the pro-inflammatory lysophosphatidylcholine, were associated with faster time-to-viral-rebound and higher viral setpoints upon ART cessation. Furthermore, higher pre-ATI levels of the pro-inflammatory byproduct of intestinal lysophosphatidylcholine metabolism, trimethylamine-N-oxide (TMAO), were also linked to faster viral rebound post-ART. Finally, pre-ATI levels of several phosphatidylcholine species (lysophosphatidylcholine precursors) correlated strongly with higher pre-ATI levels of HIV DNA in peripheral CD4<sup>+</sup> T cells. Our proof-of-concept data point to phospholipids and lysophospholipids as plausible pro-inflammatory contributors to HIV persistence and rapid post-ART HIV rebound. The potential interplay between phospholipid metabolism and both the establishment and maintenance of HIV latent reservoirs during- and post-ART warrants further investigation.

**IMPORTANCE:** The likelihood of HIV rebound after stopping antiretroviral therapy (ART) is a function of the interplay between the size of HIV reservoirs that persist despite ART and the host immunological and inflammatory factors that modulate these reservoirs. There is a need to comprehensively understand these host factors to develop a strategy to cure HIV infection and prevent viral rebound post-ART. Lipids are important biologically active molecules that are known to mediate several cellular functions, including reactivating latent tumor cells; however, their role in HIV latency, persistence, and post-ART rebound has never been investigated. We observed significant links between higher levels of the pro-inflammatory lysophosphatidylcholine and its intestinal metabolic byproduct, trimethylamine-N-oxide, and

both faster time-to-viral rebound and higher viral load setpoint post ART. These data highlight the need for further studies to understand the potential contribution of phosphatidylcholine and lysophosphatidylcholine metabolism in shaping host immunological and inflammatory milieu during- and post-ART.

**KEYWORDS:** HIV; HIV Persistence; Viral rebound; Lipids; phospholipid; Lysophospholipid; lysophosphatidylcholine; Choline; TMAO

## TEXT

A comprehensive understanding of the host factors modulating HIV persistence is imperative for developing effective strategies to eradicate the latent HIV reservoir, which persists despite antiretroviral therapy (ART) and causes viral rebound upon ART discontinuation (1). Lipids are biologically active molecules involved in a broad range of cellular processes and immunological functions, including inflammation (2, 3). It was recently shown that phospholipids and their derivatives, lysophospholipids, can reactivate latent (dormant) tumor cells, causing cancer recurrence (4). While the interplay between lipids and both HIV and ART has been studied in the context of the development of inflammation-associated comorbidities, particularly subclinical atherosclerosis (5-9), the potential impact of lipids on HIV latency, persistence, and post-ART rebound has never been investigated.

There is currently no standard method to measure the total body burden of the replication-competent HIV reservoir (1, 10). However, a possible way to estimate both the overall size of the HIV reservoir and the degree of viral control is by assessing time-to-viral-rebound and/or viral load setpoints upon cessation of ART. In this study, we profiled the circulating lipidome from the plasma of 24 chronically HIV-infected individuals on suppressive ART who subsequently underwent an analytic treatment interruption (ATI) (11, 12). All 24 individuals underwent ATI without concurrent immunomodulatory agents that might confound our analysis. Lipidomic analysis was performed using liquid chromatography–mass spectrometry (LC–MS), as described previously (13), on plasma samples collected immediately before ATI. Both time-to-viral-rebound and viral load setpoints were measured during ATI. This cohort had a wide distribution of viral rebound times (14 to 119 days; median=28) and viral load setpoints (median=13,675 copies/ml; **Supplementary Table 1**). Using these data, we investigated whether there is a link between pre-ATI lipid profiles and the body burden of HIV during ART (estimated as post-ATI time-to-viral-rebound and viral load setpoints).

***Levels of plasma lysophospholipids measured pre-ATI associate with time-to-viral-rebound post-ATI.*** We identified a total of 967 lipids, belong to 21 lipids classes (described in **Supplementary Table 2**), in the plasma samples. Using the Cox proportional-hazards model, we found that pre-ATI levels of several of these lipids significantly associated with a faster time-to-

viral-rebound (**Figure 1A**; lipids with a hazard ratio (HR)>5 and  $P<0.01$  are labeled). We next examined whether these lipids belong to particular lipidomic pathways or classes. Pathway analysis of all lipids whose pre-ATI levels associated with time-to-viral-rebound with  $P<0.05$  showed that the pathway most associated with viral rebound was glycerophospholipid metabolism (**Figure 1B**). The pre-ART levels of three lipid classes were significantly ( $FDR<0.05$ ) associated with faster time-to-viral-rebound (**Figure 1C** and **Supplementary Table 3**): lysophosphatidylcholine (LPC), lysophosphatidylethanolamine (LPE), and lysophospholipid acid (LPA). All three classes belong to the lysophospholipid group, which is a subgroup of the glycerophospholipid family shown in Figure 1B. Lysophospholipids are small bioactive lipid molecules known to play important roles in regulating several biological functions, including promoting inflammation (8, 14-19). The significant associations between these lysophospholipid classes and faster time-to-viral-rebound were confirmed using two additional, independent analyses: Mantel-Cox survival test, after separating participants into low or high groups based on the median level of each of these lipid classes (**Figure 1D**); and Spearman's rank correlation between the levels of these lipid classes and time-to-viral-rebound (**Supplementary Table 3**). These data point, for the first time, to plausible links between phospholipid and lysophospholipid metabolism and HIV rebound post ART. Intriguingly, similar phospholipids and lysophospholipids were recently shown to reactivate latent (dormant) cancer cells (4). Our exploratory findings, that are consistent with the reported functions of these lysophospholipids, raise the question of whether these lysophospholipids condition the host environment with higher levels of inflammation that might impact viral reactivation, cellular processes, and immunological functions during- and/or post-ATI.

***Levels of plasma trimethylamine-N-oxide (TMAO) measured pre-ATI associate with post-ATI time-to-viral-rebound.*** The pro-inflammatory lipid class LPC can be hydrolyzed in the intestine to LPA and choline; choline can be metabolized into trimethylamine, which is converted to trimethylamine-N-oxide (TMAO) in the liver (20). TMAO induces several pro-inflammatory mediators and has been implicated in several inflammation-associated diseases (20-23). Given that LPC and LPA lipids were among the lipids whose pre-ATI levels associated with faster viral rebound upon ART cessation (**Figure 1A-D**), we sought to examine if levels of TMAO associated with post-ATI time-to-viral rebound. We performed metabolomics analysis, using LC-MS, as described previously (24), on the same pre-ATI plasma samples. Indeed, pre-ATI

levels of TMAO were higher in individuals with lower than the median days to viral rebound (fast rebounders) compared to individuals with higher than the median days to rebound (delayed rebounders) (**Figure 1E**). Our observations that the pro-inflammatory byproducts of intestinal LPC metabolism (LPA and TMAO) are also associated with faster HIV rebound demand a greater understanding of the interaction between glycerophospholipid or choline metabolism by intestinal microbiota and viral persistence during-ART or rebound post-ART. Such understanding may inform therapeutic approaches targeting the gut microbiota–lipid metabolism interface to reduce inflammation and facilitate the clearance of HIV reservoirs.

***Pre-ATI plasma lysophospholipids associate with post-ATI viral load setpoint.*** In addition to time-to-viral-rebound, post-ART viral load setpoint can reflect the body burden of HIV during ART. Therefore, we asked whether pre-ATI lipid profiles are associated with post-ATI viral load setpoint. Pre-ATI levels of several lipids associated with post-ATI viral load setpoint with  $P < 0.01$  and Spearman  $\rho > 0.5$  (**Figure 2A**). Furthermore, pre-ATI LPC and LPE classes levels correlated with post-ATI viral load setpoint (**Figure 2B-C**, respectively). Finally, the pre-ATI levels of the LPC (24:0) lipid species, which was one of the individual lipids whose pre-ATI level correlated with time-to-viral-rebound (**Figure 1A**), also associated with post-ATI viral load setpoints (**Figure 2D**). Notably, levels of LPC (20:4) during HIV infection have been shown to associate with the progression of carotid artery atherosclerosis, even after ART suppression (6). These data indicate that pre-ATI phospholipid metabolism is linked to viral load setpoint upon ART cessation.

***Pre-ATI phosphatidylcholines associate with pre-ATI HIV DNA in the periphery.*** Finally, we examined the links between pre-ATI plasma lipidome and pre-ATI total HIV DNA measured in periphery CD4<sup>+</sup> T by droplet digital PCR (ddPCR), as described (25). Levels of several phosphatidylcholine species (precursors of lysophosphatidylcholine) significantly correlated (FDR <10%) with CD4<sup>+</sup> T cell-associated HIV DNA (**Figure 2E-H**). These data further highlight the potential links between phospholipid metabolism and HIV persistence.

Our exploratory study has limitations, including small sample size and sampling of blood. The sample size did not allow for addressing the confounding effects of age, gender, ethnicity, weight, diet, duration-of-infection, duration-on-ART, ART-regimen, or comorbidities on

lipidomic signatures. Addressing the impact of these confounders and validating our data using larger cohorts should be the subject of future studies. In addition, analyzing lipids and HIV burden in different tissues, including adipose tissue, and mechanistic studies *in vitro* and in animal models of HIV infection will be needed to examine the precise interplay between phospholipid metabolism and viral persistence. Such studies might identify lipid-based interactions that can be targeted to decrease the size of HIV reservoirs and/or delay viral rebound after stopping ART.

Despite these limitations, our study provides the first proof-of-concept evidence that phospholipid metabolism might be involved in a host milieu that facilitates a faster HIV rebound after ART cessation. The potential interactions between phospholipid/lysophospholipid metabolism and both the establishment and maintenance of HIV latency warrant further investigation.

## FIGURE LEGENDS:

**Figure 1. Higher pre-ATI lysophospholipid metabolism and its bioactive byproducts associate with faster post-ATI time-to-viral-rebound.** (A) Lipids whose pre-ATI levels associate with post-ATI time-to-viral-rebound, as determined by the Cox proportional-hazards model. Lipids with  $P < 0.01$  and hazard ratio (HR)  $> 5$  are shown in red and labeled. (B) Lipid pathway analysis of plasma lipids whose pre-ATI levels associated with time-to-viral-rebound with  $P < 0.05$  using LIPEA (Lipid Pathway Enrichment Analysis; <https://lipea.biotech.tu-dresden.de/home>). The graph shows all implicated pathways with FDR  $< 0.05$ . Numbers beside each pathway represent the number of dysregulated lipids within the particular pathway. (C) Lipid classes whose pre-ATI levels associate with post-ATI time-to-viral-rebound, as determined by the Cox proportional-hazards model. FDR was calculated using the Benjamini–Hochberg approach. (D) Confirmatory analysis of the three lysophospholipid classes using the Mantel-Cox test. Low pre-ATI levels = lower than group median; High pre-ATI levels = higher than group median. (E) Participants were separated into shorter or longer time-to-viral-rebound groups by the median of time-to-viral-rebound; levels of TMAO were higher in individuals who rebounded faster compared to individuals who rebounded slower. Mann–Whitney U test was used for statistical analysis. Statistical analyses were performed in R and Prism 7.0 (GraphPad).

**Figure 2. Pre-ATI phospholipid metabolism associates with post-ATI viral load setpoint and pre-ATI HIV DNA.** (A) Spearman's rank correlations between pre-ATI lipids and post-ATI viral load setpoint. Lipids with  $P < 0.01$  and Spearman  $\rho > 0.5$  are shown in dark blue and are labeled. (B–D) Correlations between pre-ATI levels of LPC class (B), LPE class (C), or LPC (20:4) lipid species (D) and post-ATI viral load setpoint. Each dot represents an HIV<sup>+</sup> individual. (D) Spearman's rank correlations between pre-ATI lipids and pre-ATI total HIV DNA measured in peripheral CD4<sup>+</sup> T cells. Lipids with FDR  $< 0.1$  and Spearman  $\rho > 0.5$  are shown in dark blue and are labeled. (F–H) Correlations between pre-ATI levels of several phosphatidylcholine species and pre-ATI levels of HIV DNA in peripheral CD4<sup>+</sup> T cells. All correlations were evaluated using Spearman's rank correlation coefficient tests. Statistical analyses were performed in R and Prism 7.0 (GraphPad).



## **SUPPLEMENTARY MATERIALS:**

**Supplementary Table 1.** Clinical and demographic data of the study cohort.

**Supplementary Table 2.** 967 lipids identified in this study were assigned to 21 lipid classes.

**Supplementary Table 3.** A list of lipid classes whose pre-ATI levels associate with faster time-to-viral-rebound upon ART cessation.

## **AUTHOR CONTRIBUTIONS**

M.A-M conceived and designed the study. L.B.G carried out experiments. C.S.P, A.L.L, J.Z.L, J.R.K analyzed and interpreted lipidomic and metabolic data. K.M, J.R.K, E.P, and L.J.M, selected study participants and interpreted clinical data. A.R.G and H.T performed lipidomic and metabolic analysis. X.Y and Q.L performed statistical analysis. L.B.G and M.A-M wrote the manuscript, and all authors edited it.

## **ACKNOWLEDGMENTS**

This work is supported by the Foundation for AIDS Research (amfAR) impact grant # 109840-65-RGRL to M.A-M and the NIH R21 AI143385 to M.A-M. M.A-M is also supported by NIH grants (R01 DK123733, R01 AG062383, R01NS117458, R21 AI129636, and R21 NS106970), the Penn Center for AIDS Research (P30 AI 045008), and W.W. Smith Charitable Trust grant # A1901. Lipidomic and Metabolomic analyses were performed by the Wistar Proteomics and Metabolomics Shared Resource supported in part by NIH Cancer Center Support Grant CA010815 on a Thermo Q-Exactive HF-X mass spectrometer purchased with NIH grant S10 OD023586. We would like to thank Rachel E. Locke, Ph.D., for providing comments. We would like to thank all donor participants.

## **COMPETING INTERESTS STATEMENT**

The authors have no competing interests.

## REFERENCES:

1. Abdel-Mohsen M, Richman D, Siliciano RF, Nussenzweig MC, Howell BJ, Martinez-Picado J, Chomont N, Bar KJ, Yu XG, Lichterfeld M, Alcamí J, Hazuda D, Bushman F, Siliciano JD, Betts MR, Spivak AM, Planelles V, Hahn BH, Smith DM, Ho YC, Buzon MJ, Gaebler C, Paiardini M, Li Q, Estes JD, Hope TJ, Kostman J, Mounzer K, Caskey M, Fox L, Frank I, Riley JL, Tebas P, Montaner LJ, infection B-HDCtCH-. 2020. Recommendations for measuring HIV reservoir size in cure-directed clinical trials. *Nat Med* 26:1339-1350.
2. Frasch SC, Zemski-Berry K, Murphy RC, Borregaard N, Henson PM, Bratton DL. 2007. Lysophospholipids of different classes mobilize neutrophil secretory vesicles and induce redundant signaling through G2A. *J Immunol* 178:6540-8.
3. Tall AR, Yvan-Charvet L. 2015. Cholesterol, inflammation and innate immunity. *Nat Rev Immunol* 15:104-16.
4. Perego M, Tyurin VA, Tyurina YY, Yellets J, Nacarelli T, Lin C, Nefedova Y, Kossenkova A, Liu Q, Sreedhar S, Pass H, Roth J, Vogl T, Feldser D, Zhang R, Kagan VE, Gabrilovich DI. 2020. Reactivation of dormant tumor cells by modified lipids derived from stress-activated neutrophils. *Sci Transl Med* 12.
5. Hileman CO, Turner R, Funderburg NT, Semba RD, McComsey GA. 2016. Changes in oxidized lipids drive the improvement in monocyte activation and vascular disease after statin therapy in HIV. *AIDS* 30:65-73.
6. Chai JC, Deik AA, Hua S, Wang T, Hanna DB, Xue X, Haberlen SA, Shah SJ, Suh Y, Lazar JM, Gustafson D, Hodis HN, Landay AL, Anastos K, Post WS, Kaplan RC, Clish CB, Qi Q. 2019. Association of Lipidomic Profiles With Progression of Carotid Artery Atherosclerosis in HIV Infection. *JAMA Cardiol* 4:1239-1249.
7. Trevillyan JM, Wong G, Puls R, Petoumenos K, Emery S, Mellett NA, Mundra PA, Meikle PJ, Hoy JF, Group AS. 2018. Changes in plasma lipidome following initiation of antiretroviral therapy. *PLoS One* 13:e0202944.
8. Zidar DA, Juchnowski S, Ferrari B, Clagett B, Pilch-Cooper HA, Rose S, Rodriguez B, McComsey GA, Sieg SF, Mehta NN, Lederman MM, Funderburg NT. 2015. Oxidized LDL Levels Are Increased in HIV Infection and May Drive Monocyte Activation. *J Acquir Immune Defic Syndr* 69:154-60.
9. Belury MA, Bowman E, Gabriel J, Snyder B, Kulkarni M, Palettas M, Mo X, Lake JE, Zidar D, Sieg SF, Rodriguez B, Playford MP, Andrade A, Kuritzkes DR, Mehta NN, Lederman MM, Funderburg NT. 2017. Prospective Analysis of Lipid Composition Changes with Antiretroviral Therapy and Immune Activation in Persons Living with HIV. *Pathog Immun* 2:376-403.
10. Bruner KM, Hosmane NN, Siliciano RF. 2015. Towards an HIV-1 cure: measuring the latent reservoir. *Trends Microbiol* 23:192-203.
11. Papasavvas E, Lada SM, Joseph J, Yin X, Liu Q, Azzoni L, Mounzer K, Kostman JR, Richman D, Montaner LJ. 2018. Analytical ART interruption does not irreversibly change pre-interruption levels of cellular HIV. *AIDS* doi:10.1097/QAD.0000000000001909.
12. Papasavvas E, Kostman JR, Mounzer K, Grant RM, Gross R, Gallo C, Azzoni L, Foulkes A, Thiel B, Pistilli M, Mackiewicz A, Shull J, Montaner LJ. 2004. Randomized, controlled trial of therapy interruption in chronic HIV-1 infection. *PLoS Med* 1:e64.

13. Alicea GM, Rebecca VW, Goldman AR, Fane ME, Douglass SM, Behera R, Webster MR, Kugel CH, 3rd, Ecker BL, Caino MC, Kossenkova AV, Tang HY, Frederick DT, Flaherty KT, Xu X, Liu Q, Gabrilovich DI, Herlyn M, Blair IA, Schug ZT, Speicher DW, Weeraratna AT. 2020. Changes in Aged Fibroblast Lipid Metabolism Induce Age-Dependent Melanoma Cell Resistance to Targeted Therapy via the Fatty Acid Transporter FATP2. *Cancer Discov* 10:1282-1295.
14. Xu Y. 2002. Sphingosylphosphorylcholine and lysophosphatidylcholine: G protein-coupled receptors and receptor-mediated signal transduction. *Biochim Biophys Acta* 1582:81-8.
15. Zhao Y, Natarajan V. 2013. Lysophosphatidic acid (LPA) and its receptors: role in airway inflammation and remodeling. *Biochim Biophys Acta* 1831:86-92.
16. Qin X, Qiu C, Zhao L. 2014. Lysophosphatidylcholine perpetuates macrophage polarization toward classically activated phenotype in inflammation. *Cell Immunol* 289:185-90.
17. Wang L, Radu CG, Yang LV, Bentolila LA, Riedinger M, Witte ON. 2005. Lysophosphatidylcholine-induced surface redistribution regulates signaling of the murine G protein-coupled receptor G2A. *Mol Biol Cell* 16:2234-47.
18. Akerele OA, Cheema SK. 2015. Fatty acyl composition of lysophosphatidylcholine is important in atherosclerosis. *Med Hypotheses* 85:754-60.
19. Wells IC, Peitzmeier G, Vincent JK. 1986. Lecithin: cholesterol acyltransferase and lysollecithin in coronary atherosclerosis. *Exp Mol Pathol* 45:303-10.
20. Wang Z, Klipfell E, Bennett BJ, Koeth R, Levison BS, Dugar B, Feldstein AE, Britt EB, Fu X, Chung YM, Wu Y, Schauer P, Smith JD, Allayee H, Tang WH, DiDonato JA, Lusis AJ, Hazen SL. 2011. Gut flora metabolism of phosphatidylcholine promotes cardiovascular disease. *Nature* 472:57-63.
21. Bae S, Ulrich CM, Neuhauser ML, Malysheva O, Bailey LB, Xiao L, Brown EC, Cushing-Haugen KL, Zheng Y, Cheng TY, Miller JW, Green R, Lane DS, Beresford SA, Caudill MA. 2014. Plasma choline metabolites and colorectal cancer risk in the Women's Health Initiative Observational Study. *Cancer Res* 74:7442-52.
22. Zeisel SH, Warrier M. 2017. Trimethylamine N-Oxide, the Microbiome, and Heart and Kidney Disease. *Annu Rev Nutr* 37:157-181.
23. Seldin MM, Meng Y, Qi H, Zhu W, Wang Z, Hazen SL, Lusis AJ, Shih DM. 2016. Trimethylamine N-Oxide Promotes Vascular Inflammation Through Signaling of Mitogen-Activated Protein Kinase and Nuclear Factor-kappaB. *J Am Heart Assoc* 5.
24. Li J, Agarwal E, Bertolini I, Seo JH, Caino MC, Ghosh JC, Kossenkova AV, Liu Q, Tang HY, Goldman AR, Languino LR, Speicher DW, Altieri DC. 2020. The mitophagy effector FUNDC1 controls mitochondrial reprogramming and cellular plasticity in cancer cells. *Sci Signal* 13.
25. Papasavvas E, Lada SM, Joseph J, Yin X, Liu Q, Azzoni L, Mounzer K, Kostman JR, Richman D, Montaner LJ. 2018. Analytical antiretroviral therapy interruption does not irreversibly change pre-interruption levels of cellular HIV. *AIDS* 32:1763-1772.

**Figure 1**

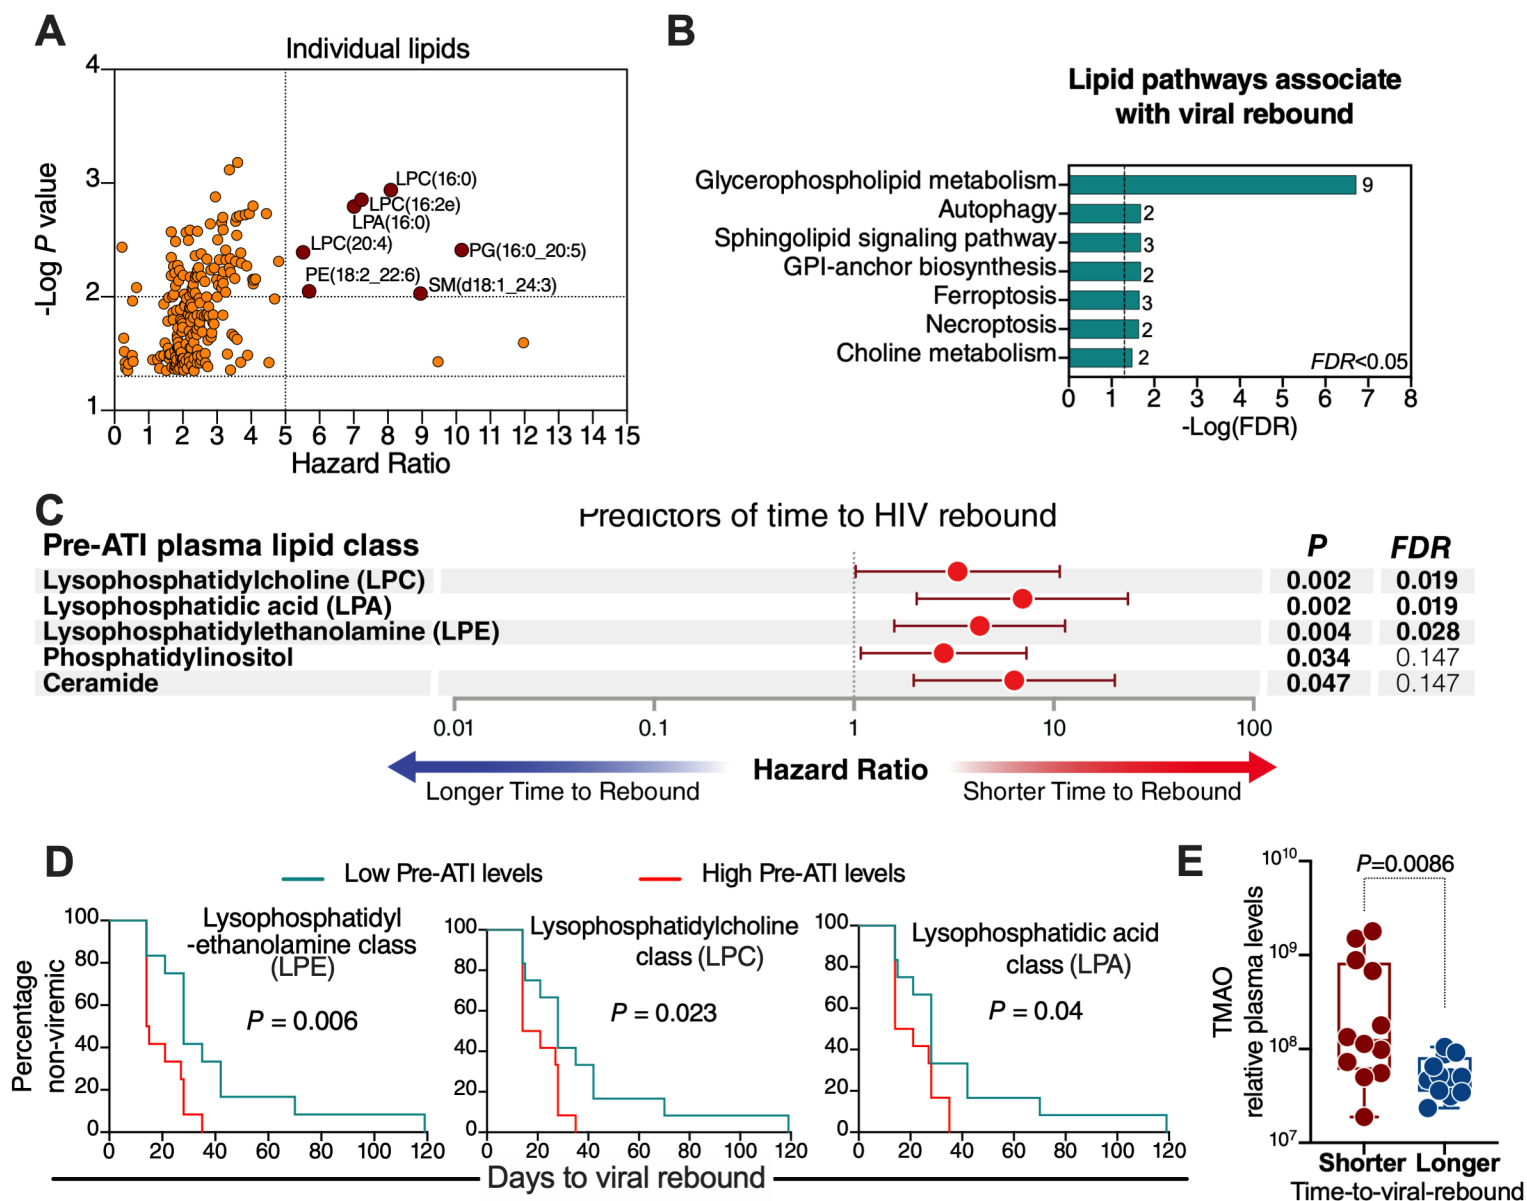

**Figure 2**

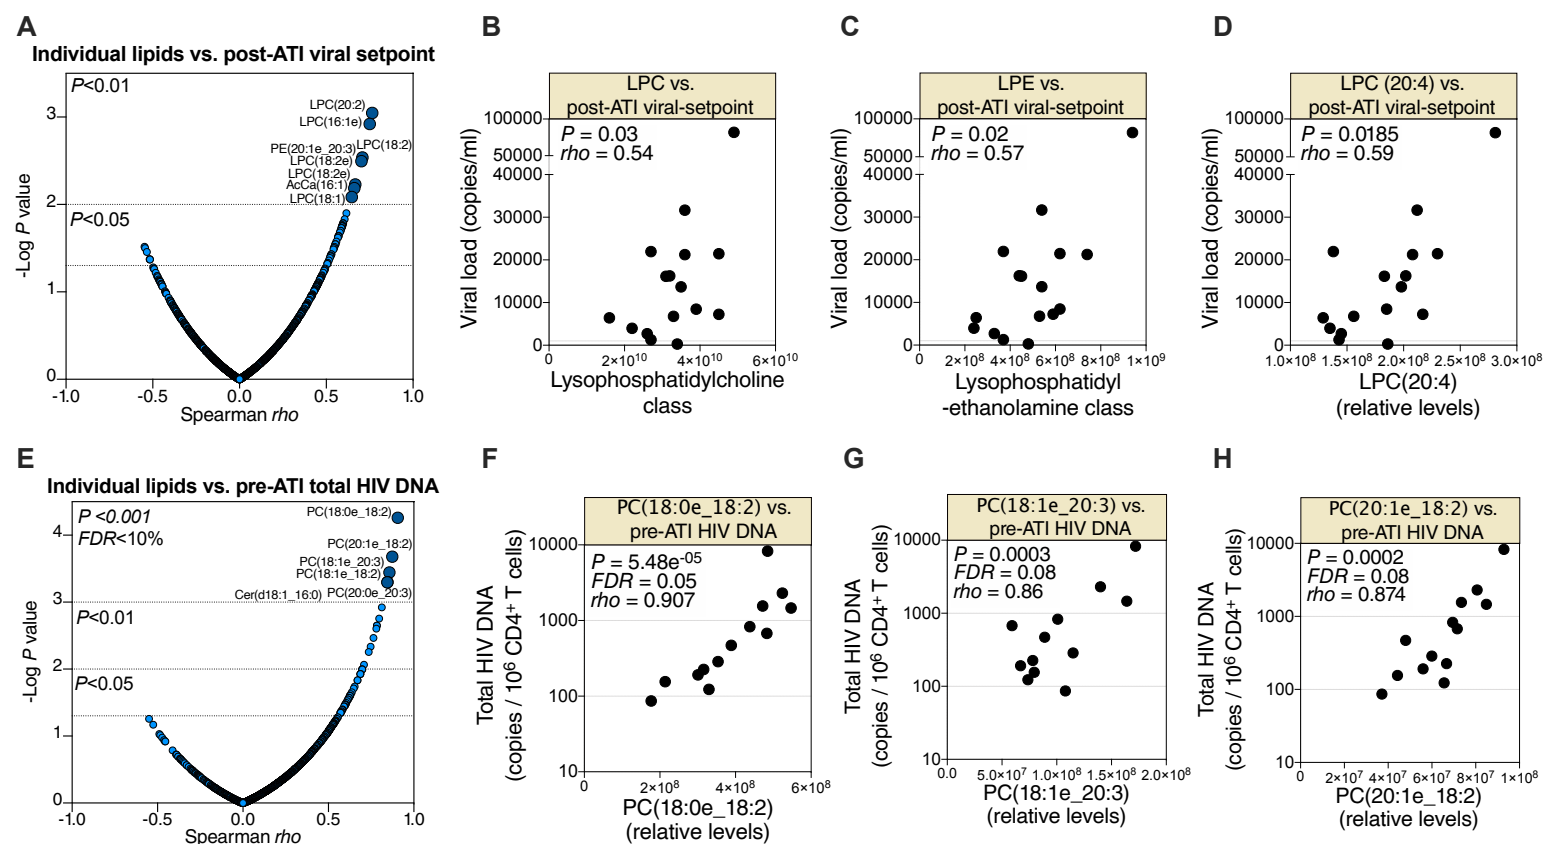

Source: http://biorxiv.org/content/10.1101/2020.12.09.418814v1.full.pdf
